# Supplementary material
Source: PubMed Central journal article supplement (PMC6157723)
Supplement: NIHMS79707-supplement-ESI.pdf [file NIHMS79707-supplement-ESI.pdf]

# Supporting Information

## **Aqueous solutions of surface-active ionic liquids: remarkable alternative solvents to improve the solubility of triterpenic acids and their extraction from biomass**

*Emanuelle L. P. de Faria<sup>†</sup>, Selesa V. Shabudin<sup>†</sup>, Ana Filipa M. Cláudio<sup>†</sup>, Mónica  
Válega<sup>‡</sup>, Fernando M. J. Domingues<sup>§</sup>, Carmen S. R. Freire<sup>†</sup>, Armando J. D.  
Silvestre<sup>†</sup>, Mara G. Freire<sup>†\*</sup>*

<sup>†</sup>CICECO – Aveiro Institute of Materials, Chemistry Department, University of Aveiro,  
University Campus of Santiago, 3810-193 Aveiro, Portugal

<sup>‡</sup>QOPNA – Chemistry Department, University of Aveiro, University Campus of  
Santiago, 3810-193 Aveiro, Portugal

<sup>§</sup>Chemistry Department, University of Aveiro, University Campus of Santiago, 3810-193  
Aveiro, Portugal

\*E-mail address: [maragfreire@ua.pt](mailto:maragfreire@ua.pt)

### **Supporting Information Contents:**

**Number of pages:** 7

**Number of figures:** 3

**Number of tables:** 5

## Figures/Tables

(a)

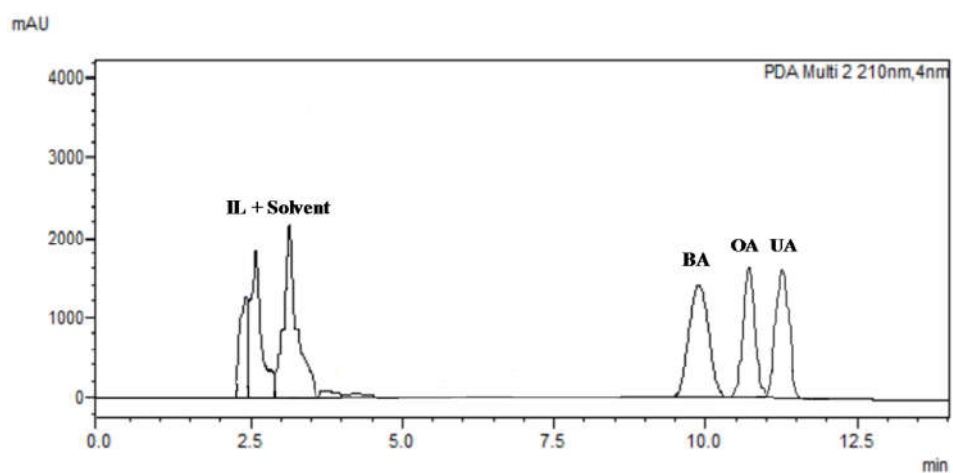

(b)

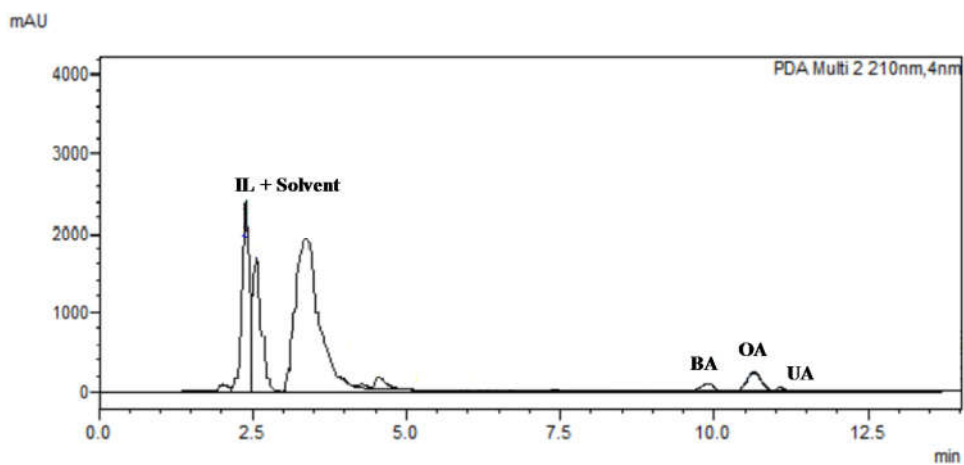

**Fig. S1.** Illustrative HPLC chromatograms corresponding to (a) standards TTAs, namely, UA, OA and BA, dissolved in an aqueous solutions of  $[C_{14}C_{1im}]Cl$ ; (b)  $[C_{14}C_{1im}]Cl$  (500 mM) aqueous solution after the extraction from apple peels at  $80^{\circ}C$  (b).

**Table S1.** Solubility of ursolic acid in aqueous solutions of ILs at 30°C.

| Ionic Liquid/Concentration                                                          | [Ursolic Acid] $\pm \sigma$ / (g.L <sup>-1</sup> ) |                   |                   |                   |                   |                   |
|-------------------------------------------------------------------------------------|----------------------------------------------------|-------------------|-------------------|-------------------|-------------------|-------------------|
|                                                                                     | 50 mM                                              | 150 mM            | 250 mM            | 500 mM            | 750 mM            | 1000 mM           |
| [C <sub>8</sub> C <sub>1</sub> im]Cl                                                | -                                                  | 0.004 $\pm$ 0.001 | 0.028 $\pm$ 0.001 | 0.091 $\pm$ 0.003 | 0.280 $\pm$ 0.016 | 0.435 $\pm$ 0.007 |
| [C <sub>10</sub> C <sub>1</sub> im]Cl                                               | 0.007 $\pm$ 0.000                                  | 0.192 $\pm$ 0.001 | 0.461 $\pm$ 0.009 | 1.008 $\pm$ 0.439 | 1.474 $\pm$ 0.048 | 1.612 $\pm$ 0.014 |
| [C <sub>12</sub> C <sub>1</sub> im]Cl                                               | 0.059 $\pm$ 0.001                                  | 0.412 $\pm$ 0.009 | 0.699 $\pm$ 0.045 | 1.173 $\pm$ 0.068 | 1.544 $\pm$ 0.028 | 1.714 $\pm$ 0.052 |
| [C <sub>14</sub> C <sub>1</sub> im]Cl                                               | 0.321 $\pm$ 0.007                                  | 0.544 $\pm$ 0.023 | 0.868 $\pm$ 0.008 | 1.656 $\pm$ 0.038 | 1.919 $\pm$ 0.005 | 2.852 $\pm$ 0.009 |
| [C <sub>16</sub> C <sub>1</sub> im]Cl                                               | 0.227 $\pm$ 0.005                                  | 0.892 $\pm$ 0.010 | 1.404 $\pm$ 0.036 | 2.481 $\pm$ 0.057 | 0.815 $\pm$ 0.110 | ND                |
| [C <sub>18</sub> C <sub>1</sub> im]Cl                                               | 0.419 $\pm$ 0.019                                  | 1.180 $\pm$ 0.018 | ND                | ND                | ND                | ND                |
| [C <sub>4</sub> C <sub>1</sub> im][C <sub>8</sub> H <sub>17</sub> SO <sub>4</sub> ] | 0.179 $\pm$ 0.007                                  | 1.931 $\pm$ 0.001 | 3.130 $\pm$ 0.001 | 1.849 $\pm$ 0.005 | 1.549 $\pm$ 0.005 | 1.343 $\pm$ 0.050 |
| [P <sub>444,14</sub> ]Cl                                                            | 0.235 $\pm$ 0.003                                  | 0.299 $\pm$ 0.003 | 0.348 $\pm$ 0.003 | 0.370 $\pm$ 0.004 | 0.488 $\pm$ 0.006 | 0.813 $\pm$ 0.029 |

\*ND – Not determined.

**Table S2.** Solubility of ursolic acid in aqueous solutions of conventional surfactants at 30°C.

| Conventional Surfactant/Concentration | [Ursolic Acid] $\pm \sigma$ / (g.L <sup>-1</sup> ) |                   |                   |                   |        |         |
|---------------------------------------|----------------------------------------------------|-------------------|-------------------|-------------------|--------|---------|
|                                       | 50 mM                                              | 150 mM            | 250 mM            | 500 mM            | 750 mM | 1000 mM |
| SDS                                   | 0.325 $\pm$ 0.001                                  | 1.350 $\pm$ 0.044 | ND                | ND                | ND     | ND      |
| CTAB                                  | 0.078 $\pm$ 0.001                                  | 0.259 $\pm$ 0.002 | 0.980 $\pm$ 0.036 | 1.607 $\pm$ 0.009 | ND     | ND      |
| SDBS                                  | 1.240 $\pm$ 0.077                                  | 2.092 $\pm$ 0.066 | 2.480 $\pm$ 0.045 | ND                | ND     | ND      |

\*ND – Not determined.

**Table S3.** CMC values of the studied surface-active ILs at 30°C.

| [Ionic Liquids]                                                                     | CMC (mM) $\pm \sigma$<br>(measured) | Literature                            |
|-------------------------------------------------------------------------------------|-------------------------------------|---------------------------------------|
| [C <sub>8</sub> C <sub>1</sub> im]Cl                                                | 233.0 $\pm$ 1.4                     | 238.0 <sup>1</sup>                    |
| [C <sub>10</sub> C <sub>1</sub> im]Cl                                               | 58.7 $\pm$ 0.8                      | 57.2 <sup>2</sup> ; 55.0 <sup>3</sup> |
| [C <sub>12</sub> C <sub>1</sub> im]Cl                                               | 15.2 $\pm$ 0.9                      | 15.1 <sup>3</sup> ; 13.5 <sup>4</sup> |
| [C <sub>14</sub> C <sub>1</sub> im]Cl                                               | 3.9 $\pm$ 0.1                       | 3.8 <sup>5</sup> ; 3.6 <sup>4</sup>   |
| [C <sub>16</sub> C <sub>1</sub> im]Cl                                               | 0.9 $\pm$ 0.2                       | 0.9 <sup>3,4</sup> / 1.1 <sup>3</sup> |
| [C <sub>18</sub> C <sub>1</sub> im]Cl                                               | 0.3 $\pm$ 0.03                      | 0.4 <sup>2</sup> ; 0.4 <sup>3</sup>   |
| [C <sub>4</sub> C <sub>1</sub> im][C <sub>8</sub> H <sub>17</sub> SO <sub>4</sub> ] | 30.3 $\pm$ 0.7                      | 31.0 <sup>6</sup>                     |

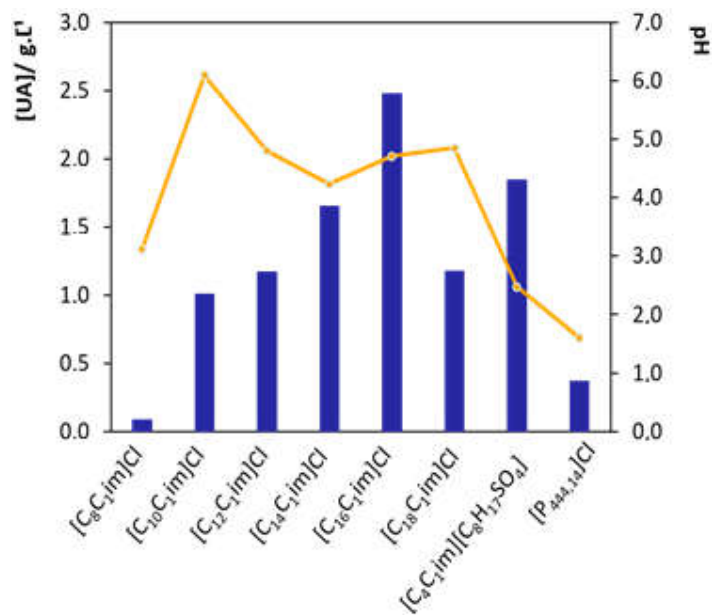

**Fig. S2.** pH ( ) and UA solubility ( ) in ILs aqueous solutions at 30°C.

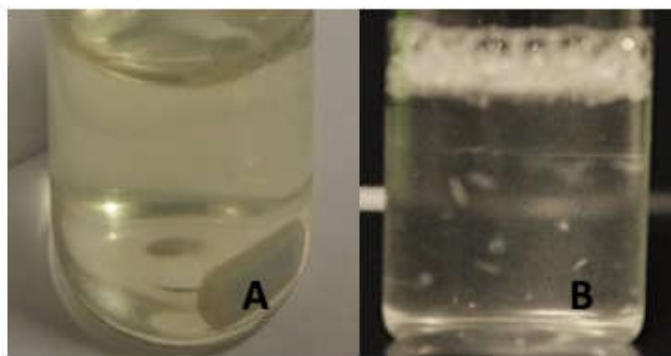

**Fig. S3.** Demonstration of the ability to use water as an anti-solvent in the precipitation of UA from an aqueous solution of  $[C_4C_{1im}][C_8H_{17}SO_4]$ . A: before water addition; B: after water addition.

**Table S4.** Extraction yields (EY) of TTAs (BA (betulinic), OA (oleanolic) and UA (ursolic) acids) from green apple peels with  $[C_{14}C_{1im}]Cl$  at different temperatures and fixed conditions ( $[IL] = 500mM$ ,  $t = 60$  min,  $R_{S:L} = 1:10$ ).

| $[C_{14}C_{1im}]Cl$ | Triterpenic Acids | T / °C | EY $\pm \sigma$ / wt. % |
|---------------------|-------------------|--------|-------------------------|
| 500 mM              | BA                | 25     | ND                      |
|                     |                   | 50     | $0.071 \pm 0.001$       |
|                     |                   | 80     | $0.898 \pm 0.001$       |
|                     |                   | 90     | $0.105 \pm 0.002$       |
| 500 mM              | OA                | 25     | ND                      |
|                     |                   | 50     | $0.437 \pm 0.002$       |
|                     |                   | 80     | $1.638 \pm 0.001$       |
|                     |                   | 90     | $1.561 \pm 0.001$       |
| 500 mM              | UA                | 25     | ND                      |
|                     |                   | 50     | $0.042 \pm 0.001$       |
|                     |                   | 80     | $0.081 \pm 0.002$       |
|                     |                   | 90     | $0.072 \pm 0.002$       |

\*ND – Not determined.

**Table S5.** Extraction yields of TTAs (BA, OA and UA) extracted from green apple peels with volatile organic solvents at fixed conditions (T = 80°C under reflux, t = 60 min, R<sub>S:L</sub> = 1:10).

| <b>Solvent</b>    | <b>Triterpenic Acids</b> | <b>EY ± σ / wt.%</b> |
|-------------------|--------------------------|----------------------|
| <b>Acetone</b>    | BA                       | 0.824 ± 0.003        |
|                   | OA                       | 0.450 ± 0.006        |
|                   | UA                       | 0.090 ± 0.002        |
| <b>Chloroform</b> | BA                       | 1.393 ± 0.005        |
|                   | OA                       | 1.049 ± 0.001        |
|                   | UA                       | 0.032 ± 0.002        |

## References

1. Łuczak, J., Hupka, J., Thöming, J., Jungnickel, C., Self-organization of imidazolium ionic liquids in aqueous solution, *Colloid Surfaces A*, **2008**, 329, 125-133.
2. Łuczak, J., Jungnickel, C., Joskowska, M., Thöming, J., Hupka, J., Thermodynamics of micellization of imidazolium ionic liquids in aqueous solutions, *J. Colloid Interface Sci.*, **2009**, 336, 111-116.
3. Smirnova, N. A., Safonova, E. A., Micellization in solutions of ionic liquids, *Colloid J.*, **2012**, 74, 254-265.
4. El Seoud, O. A., Pires, P. A. R., Abdel-Moghny, T., Bastos, E. L., Synthesis and micellar properties of surface-active ionic liquids: 1-Alkyl-3-methylimidazolium chlorides, *J. Colloid Interface Sci.*, **2007**, 313, 296-304.
5. Bai, G., Lopes, A., Bastos, M., Thermodynamics of micellization of alkyimidazolium surfactants in aqueous solution, *J. Chem. Thermodyn.*, **2008**, 40, 1509-1516.
6. Miskolczy, Z., Sebök-Nagy, K., Biczók, L., Göktürk, S., Aggregation and micelle formation of ionic liquids in aqueous solution, *Chem Phys Lett.*, **2004**, 400, 296-300.
